# Supplementary material
Source: bioRxiv or medRxiv preprint supplement (https://www.biorxiv.org/highwire/filestream/42273/field_highwire_adjunct_files/0/143081-1.pdf)
Supplement: Supplementary file [file 143081-1.pdf]

# ANNOgesic: A genome annotation pipeline for bacterial RNA-Seq data

Sung-Huan Yu<sup>1</sup>, Jörg Vogel<sup>1</sup>, and Konrad U. Förstner<sup>1,2\*</sup>

<sup>1</sup>Institute of Molecular Infection Biology (IMIB), University of Würzburg, 97080 Würzburg, Germany

<sup>2</sup>Core Unit Systems Medicine, University of Würzburg, 97070 Würzburg, Germany

To whom correspondence should be addressed. Tel: +49-931/31-84279 ; Email: konrad.foerstner@uni-wuerzburg.de

## Supplementary Figures

A

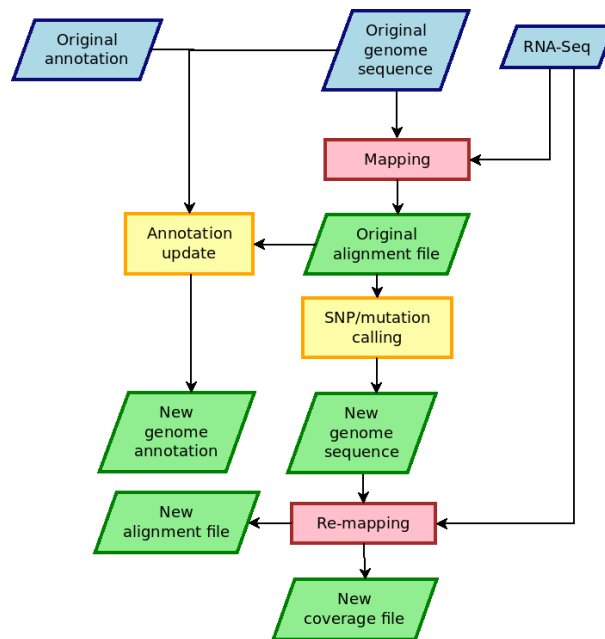

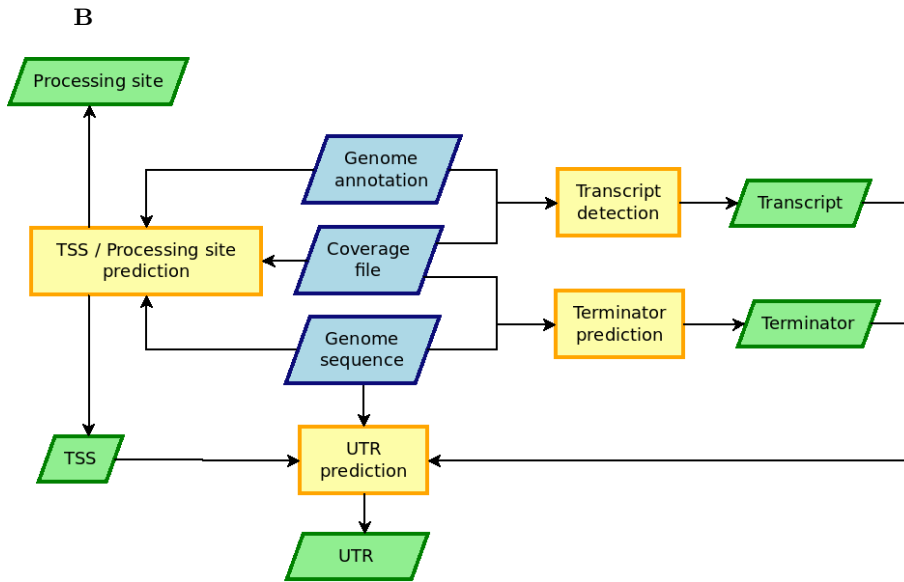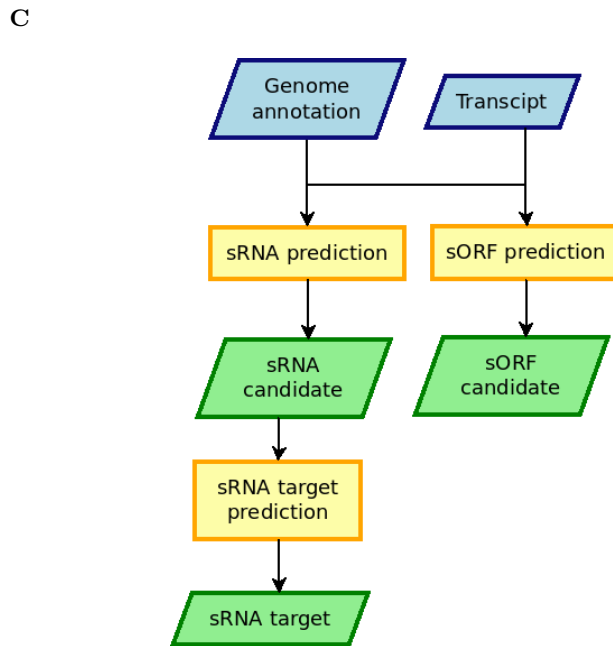

D

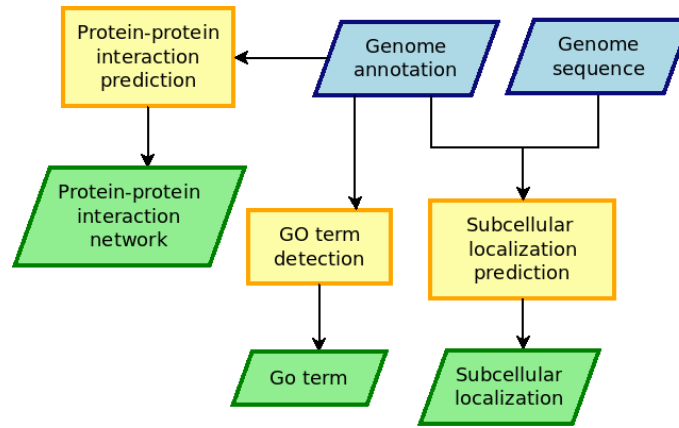

E

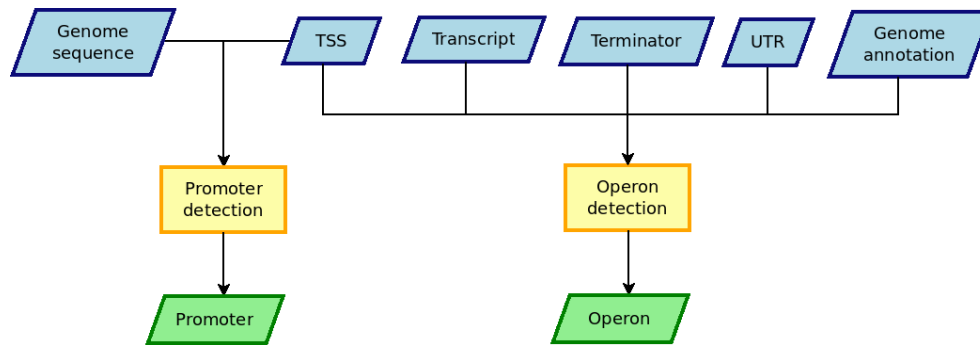

**F**

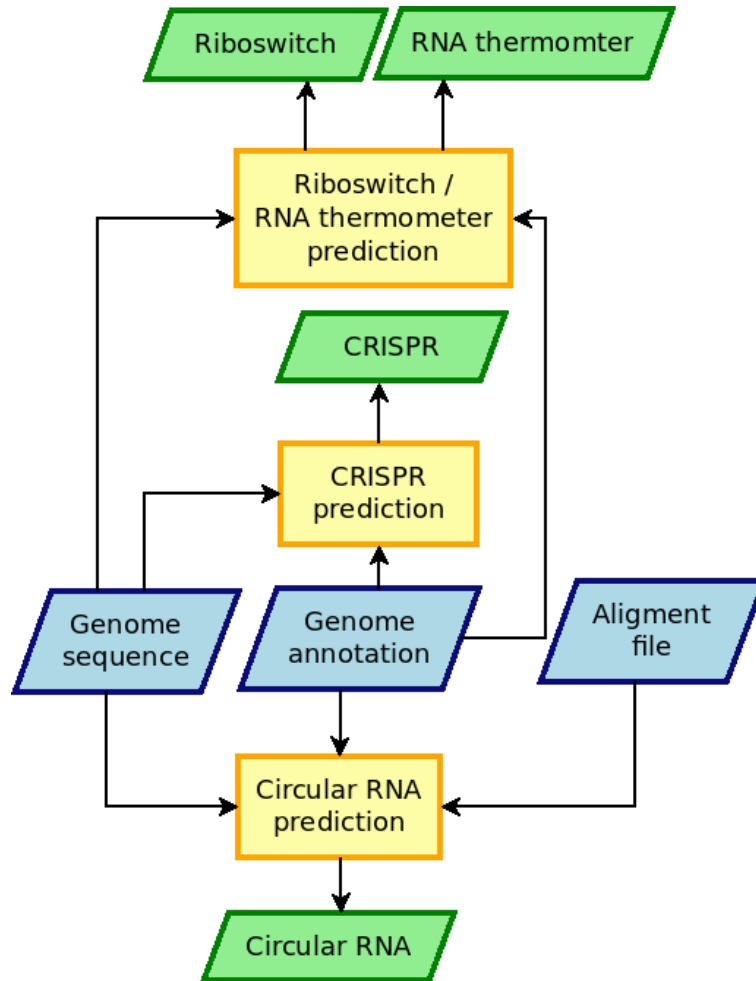

**Supplementary Figure 1:** Workflow charts of ANNogestic modules. The yellow blocks represent the tools or methods of detection. The red blocks indicate that it is performed by the third-party tools. The blue parallelograms and the green parallelograms are input and output, respectively. **(A)** Reference genome improvement, **(B)** Transcript boundary, **(C)** Small RNA and small ORF, **(D)** Regulatory feature, **(E)** Promoter and Operon and **(F)** Other features.

A

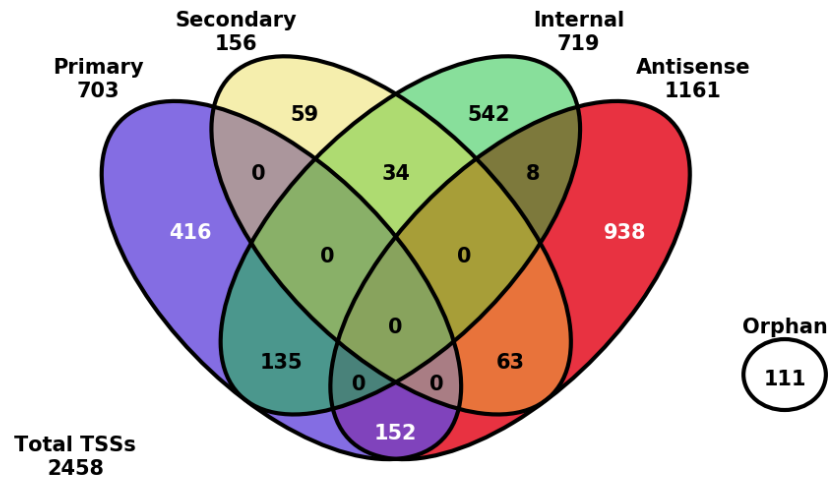

B

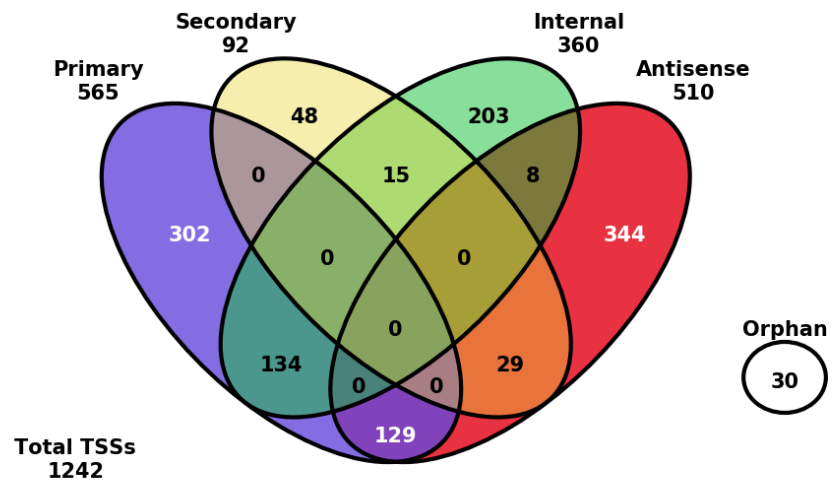

**Supplementary Figure 2:** The distribution of TSS classes. (A) *Helicobacter pylori* 26695. (B) *Campylobacter jejuni* 81116.

A

Expressed terminator with coverage decrease

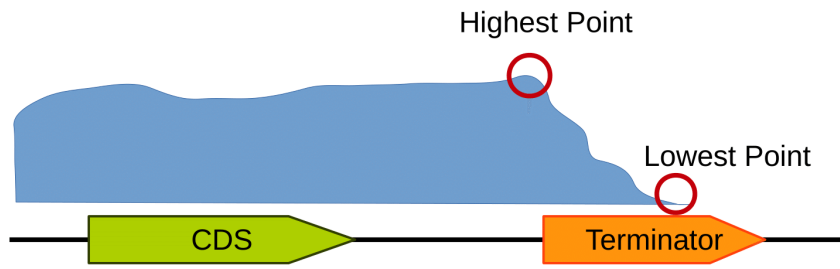

B

Expressed terminator without coverage decrease

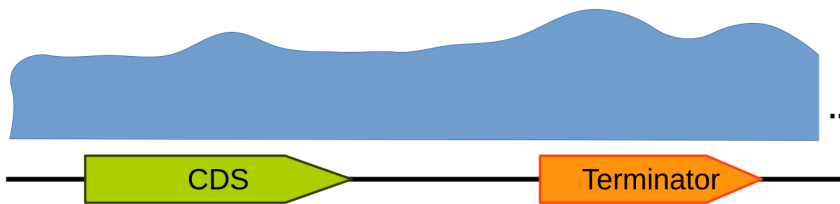

C

Terminator without expression

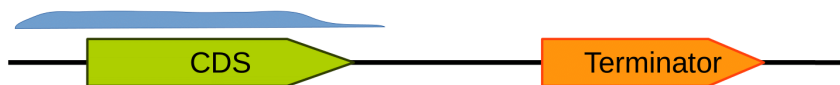

D

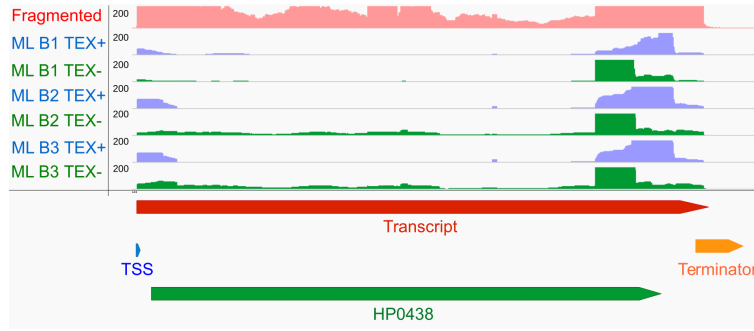

E

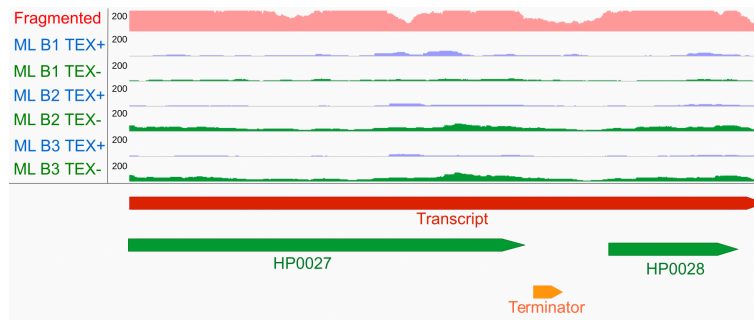

F

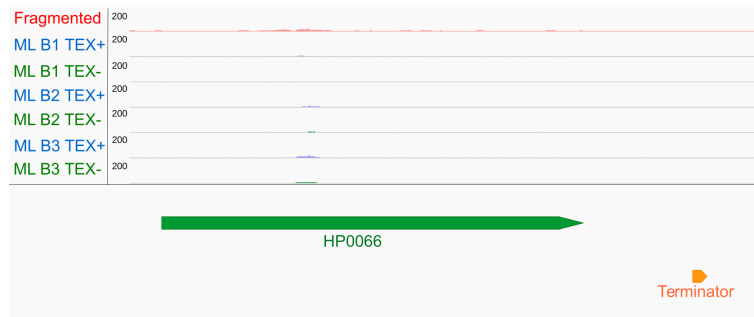

**Supplementary Figure 3:** The method and examples for detecting coverage decrease of terminators. (A) and (D) An expressed terminator with coverage significant drop. The ratio of the lowest coverage value and the highest coverage values is lower than 0.5 (default). (B) and (E) An expressed terminator without coverage decrease. (C) and (F) A terminator without expression. In (D), (E), and (F), the coverage of RNA-Seq with transcript fragmentation, TEX+ and TEX- of dRNA-Seq are presented as pink, blue and green coverages, respectively. Terminators, TSSs, CDSs and transcripts are showed as orange, blue, green and red bars, respectively.

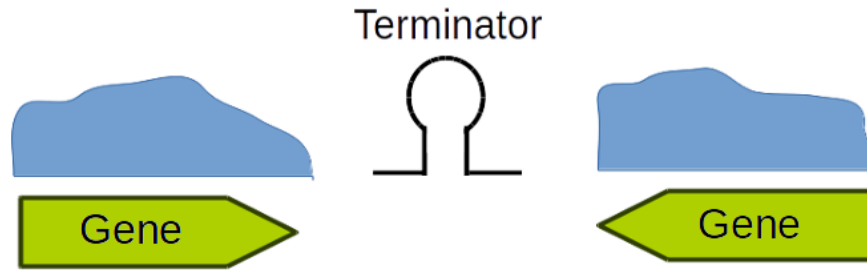

**Supplementary Figure 4:** Terminator prediction approach based on convergent genes. The blue curve-blocks represent the coverages; the green arrows show two genes from different strands. Ideally, there should be a  $\rho$ -independent terminator within the region of two converging genes.



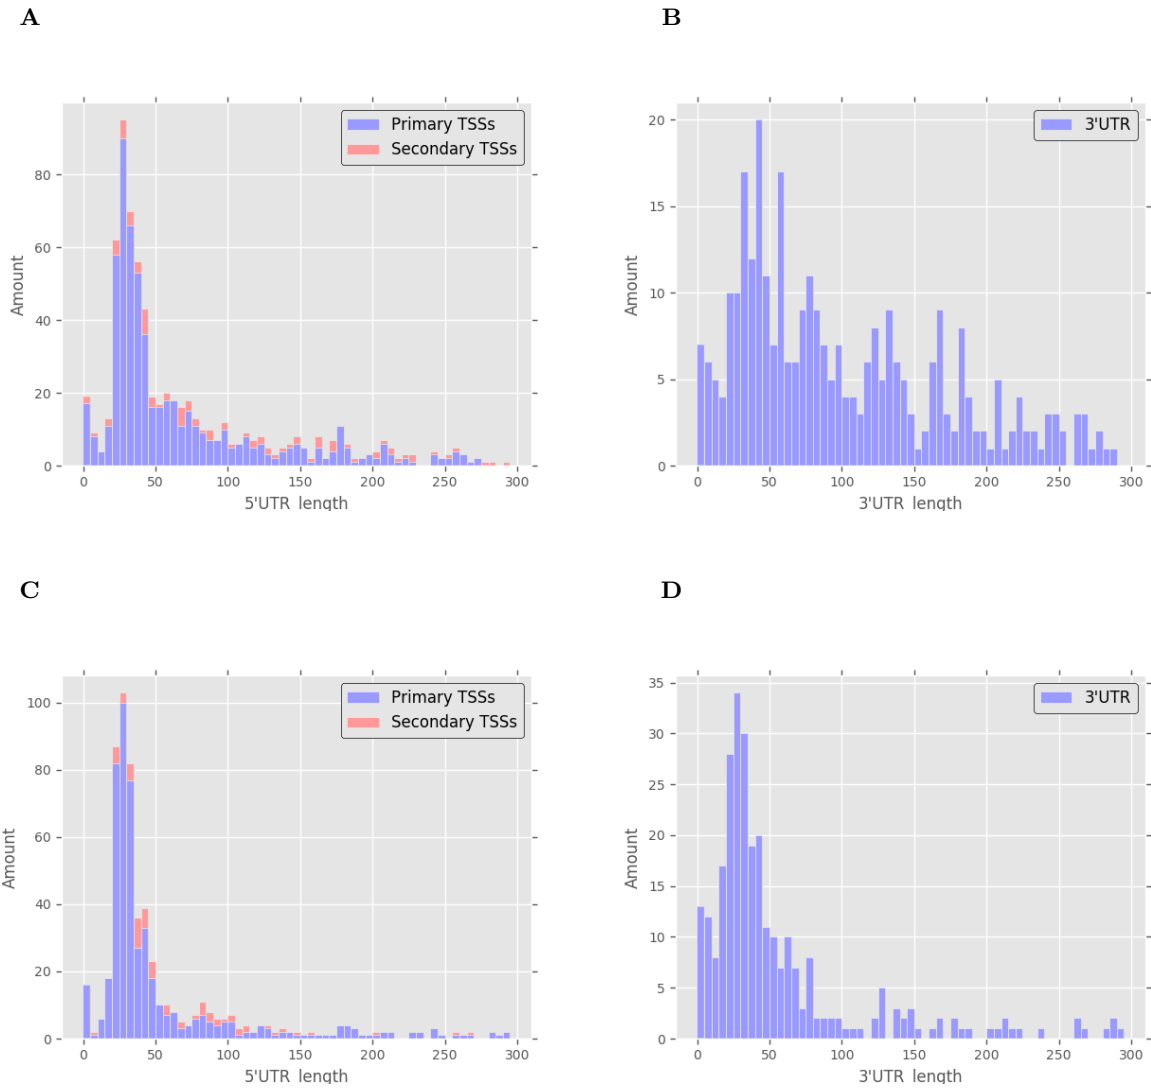

**Supplementary Figure 5:** The length distribution of UTRs. For 5'UTR the blue bars represent primary TSSs and the pink bars represent secondary TSSs. **(A)** 5'UTRs of *Helicobacter pylori* 26695. **(B)** 3'UTRs of *Helicobacter pylori* 26695. **(C)** 5'UTRs of *Campylobacter jejuni* 81116. **(D)** 3'UTRs of *Campylobacter jejuni* 81116.



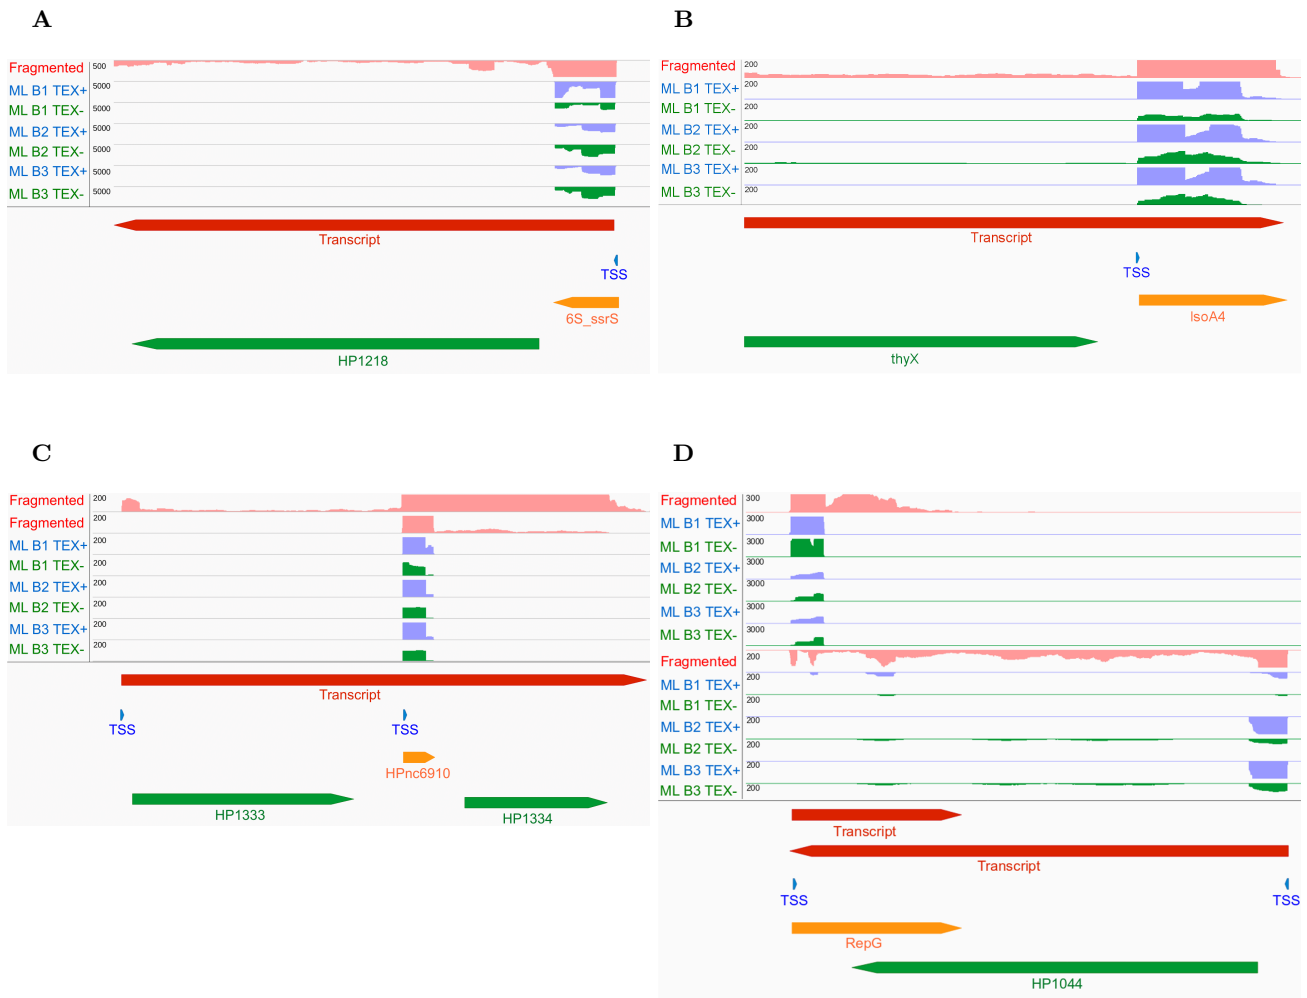

**Supplementary Figure 8:** The examples of antisense and UTR derived sRNAs that ANNOgesic can detect. The coverage of RNA-Seq with fragmentation, TEX+ and TEX- of dRNA-Seq are presented as pink, blue and green coverages, respectively. In the annotation track sRNAs, TSSs, CDSs and transcripts are showed as orange, blue, green and red bars, respectively. **(A)** 5'UTR-derived sRNA – the sRNA and CDS are in the same transcript and the sRNA is located in the 5'UTR. **(B)** 3'UTR-derived sRNA – the sRNA and CDS are in the same transcript and sRNA is located in 3'UTR. **(C)** InterCDS-derived sRNA – the sRNA and CDSs are in the same transcript, and sRNA is located in the non-annotated region between two CDS. The two pink coverages are from the same fragmented library, but presented by different scales. **(D)** Antisense sRNA.

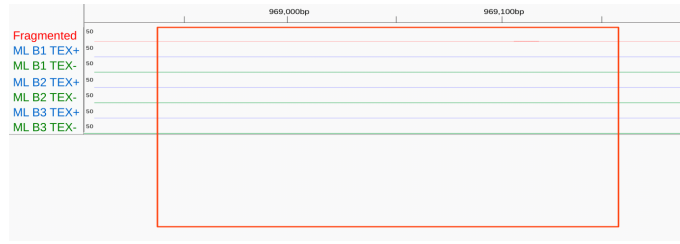

**Supplementary Figure 9:** The coverage plots of the sRNA HPnc4620 which was excluded from the benchmarking set. It is located at region from base 968980 to 969164 (marked by the orange hollow square) of *Helicobacter pylori* 26695 and has no expression.

## Ranking of sRNA

For providing the reliability of sRNA candidates, a ranking system which is based on average coverage and promoter information was implemented. (Supplementary Equation 1). In case a Pribnow box was detected in front of a sRNA, the score is the average coverage value multiplied by 2. If this is not the case, the score is simply the average coverage. The distribution of scores is shown in Supplementary Figure 10. Previously described sRNA show in general a high scoring value. The p-values of t-test between the list of benchmarking sets and the rest population are  $1.631e-09$  and  $4.629e-04$  for *Helicobacter pylori* 26695 and *Campylobacter jejuni* 81116, respectively. The results show the ranking system in ANNOgesic is reliable and useful for selection of experimental validation.

*if sRNA associated with promoter :*

$$S = C \times P$$

*else :*

$$S = C$$

**Supplementary Equation. 1:**  $S$  is the score for ranking,  $C$  is average coverage,  $P$  is the times if sRNA associated with promoter.

**A**

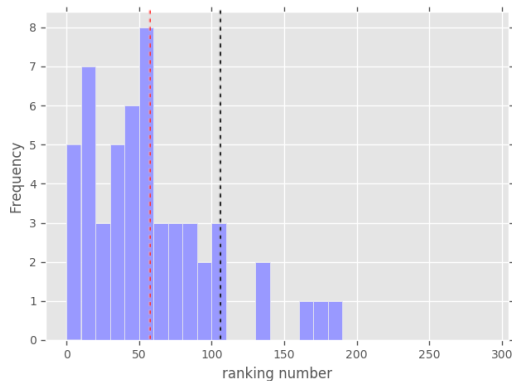

**B**

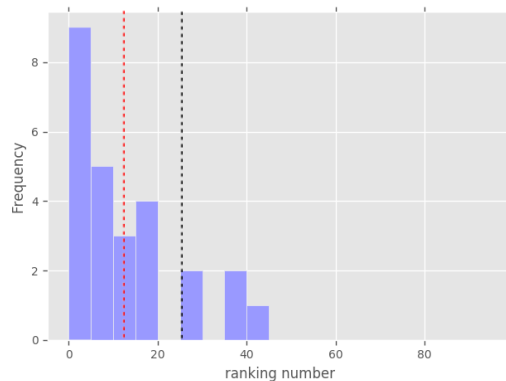

**Supplementary Figure. 10:** Histograms of ranking number of the sRNA benchmarks. The red dash line represents the average ranking number of benchmarking sets (57.25 and 13.19 of *Helicobacter pylori* 26695 and *Campylobacter jejuni* 81116, respectively), and black dash line shows the average ranking number of the rest populations (106.17 and 25.05 of *Helicobacter pylori* 26695 and *Campylobacter jejuni* 81116, respectively). **(A)** The histogram of *Helicobacter pylori* 26695 and **(B)** The histogram of *Campylobacter jejuni* 81116.





**A**

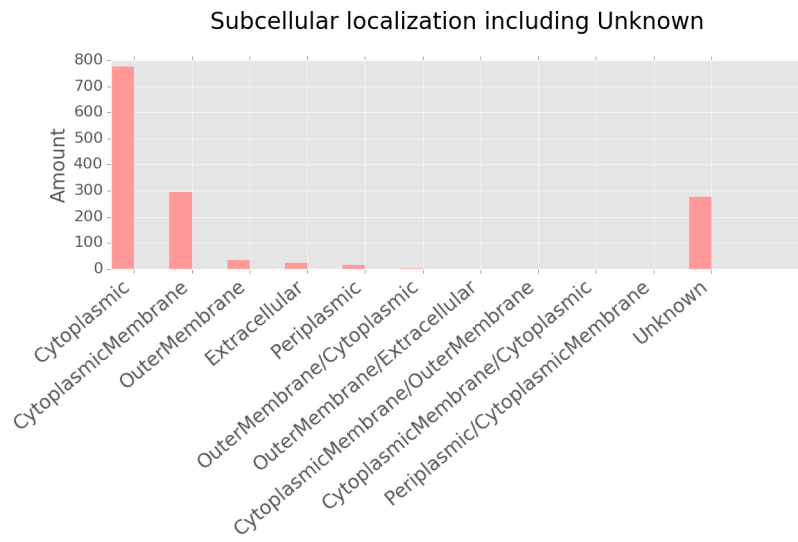

**B**

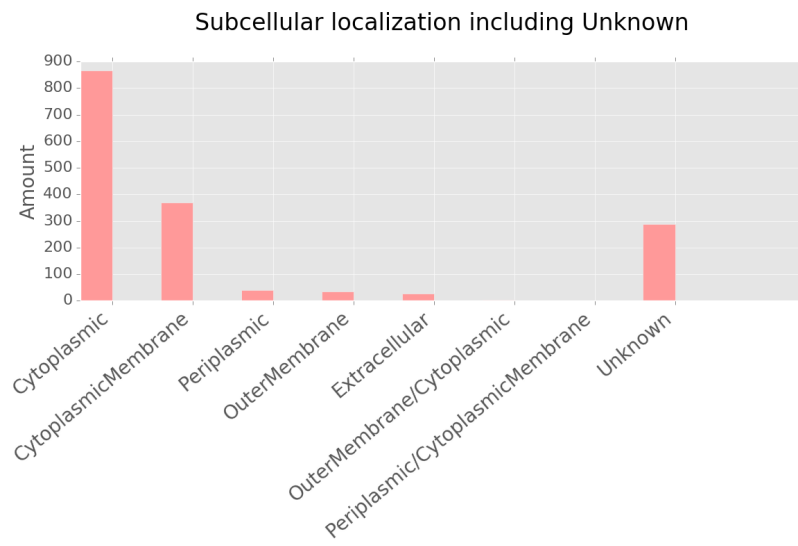

**Supplementary Figure. 12:** The distributions of subcellular localization of proteins for (A) *Helicobacter pylori* 26695, and (B) *Campylobacter jejuni* 81116.

A

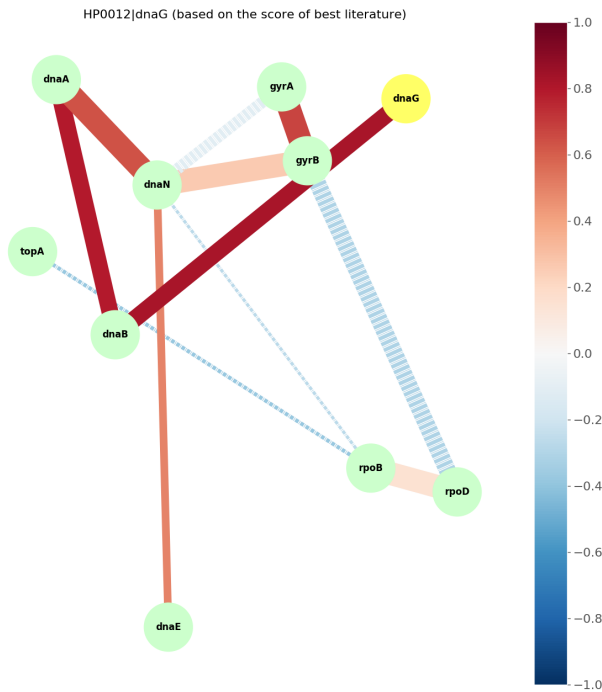

B

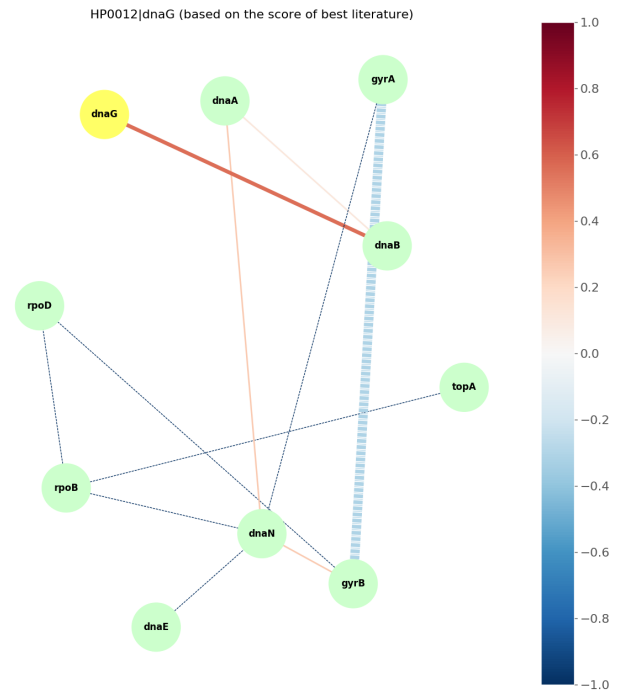

**Supplementary Figure. 13:** Visualization of protein-protein interactions. The yellow circles represent the query protein (dnaG) in *Helicobacter pylori* 26695. The other proteins are related to the query one showed as green circles. The dotted lines represent the interactions without support in the literature; the dashdot lines represent the interactions with literature support but scores (given by PIE) below 0; a solid lines indicate that the interactions are supported in the literatures with high PIE score (higher than 0); the thickness of the lines is proportional to the number of articles that report the interaction; the color of connections encode score reported by PIE. **(A)** The result of search with the text "Helicobacter pylori" **(B)** The result of search with only protein names (without the strain name).



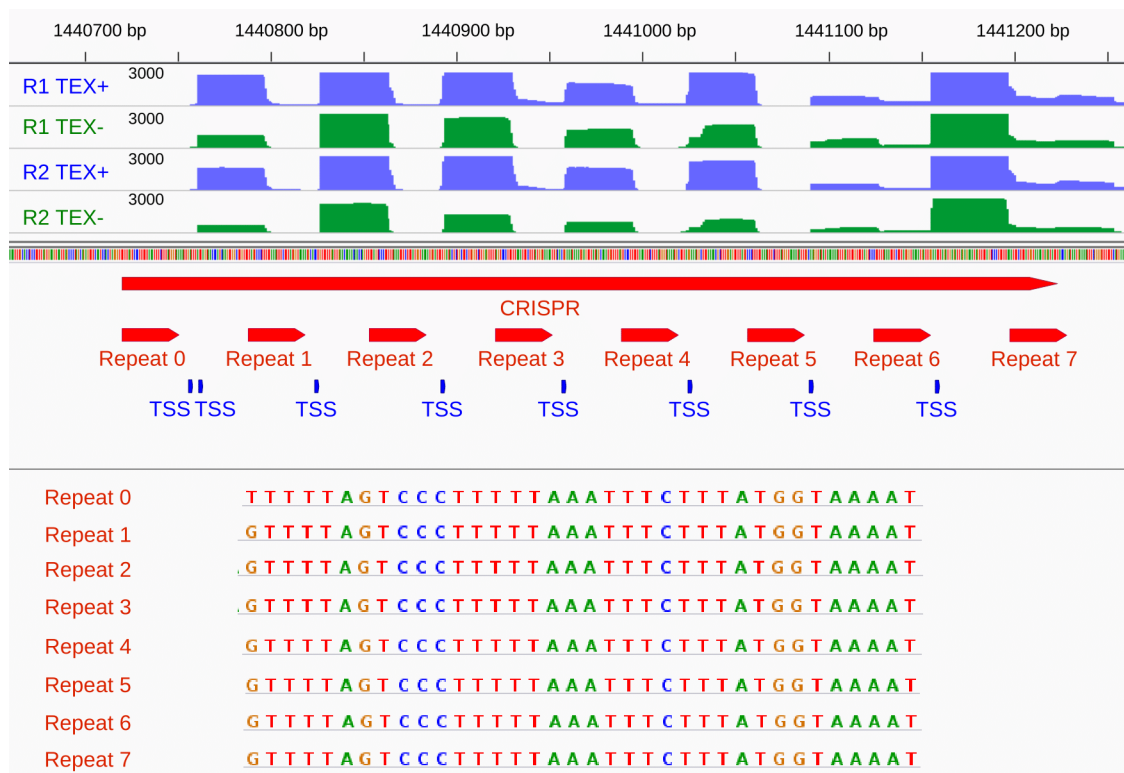

**Supplementary Figure. 14:** The example of CRISPR in *Campylobacter jejuni* 81116. The coverage of TEX+ and TEX- libraries of dRNA-Seq are presented as blue and green coverages, respectively. Red Bars represent CRISPR with repeat units, and Blue spots mean TSSs. Moreover, the repeat sequences are showed at the bottom.

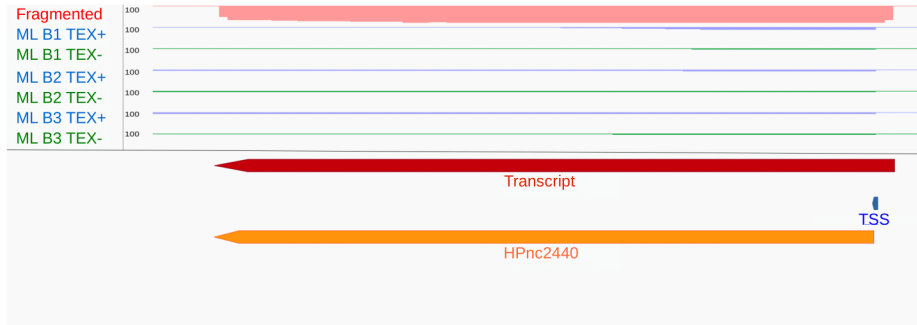

**Supplementary Figure. 15:** The sRNA which can be detected only in data RNA-Seq after transcript fragmentation. The coverage of RNA-Seq with fragmentation, TEX+ and TEX- libraries of dRNA-Seq are presented as pink, blue and green coverages, respectively.

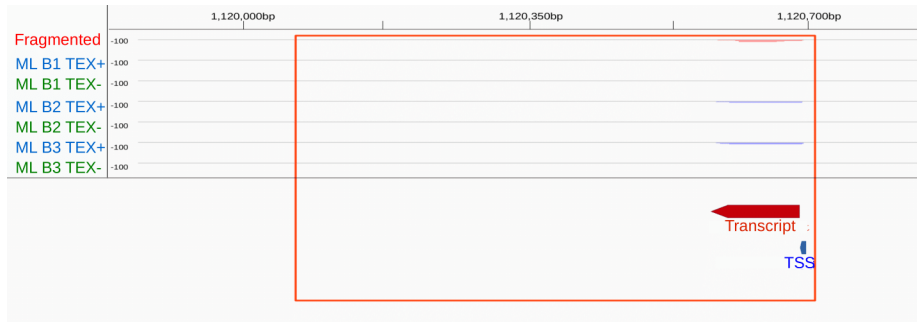

**Supplementary Figure. 16:** The lowly expressed sRNA (HPnc4610 – located in the region 968583 to 968616, orange hollow square) cannot be detected by ANNOgesic. The coverage of RNA-Seq with fragmentation, TEX+ and TEX- libraries of dRNA-Seq are presented as pink, blue and green coverages, respectively. TSS, CDS, and transcript are represented as blue, green and red bars, respectively. The average coverage of the low expressed benchmark is around 8 in the RNA-Seq data of the fragmented librara and lower than 1 in the dRNA-Seq library.

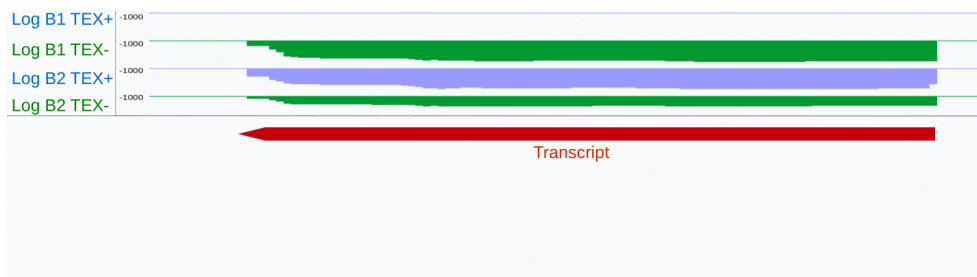

**Supplementary Figure. 17:** The example of benchmark (CJnc230 of *Campylobacter jejuni* 81116) which is not associated with a TSS. The blue coverages shows the TEX+ libraries of dRNA-Seq and green coverages represents the TEX- libraries of dRNA-Seq.

## Supplementary Tables

**Supplementary Table 1:** The default cutoffs of coverage for sRNA prediction

| Methods of RNA-Seq     | sRNA types | TSS types     | Coverage      |
|------------------------|------------|---------------|---------------|
| dRNA-Seq (TEX+)        | intergenic | primary       | not included  |
|                        |            | secondary     | not included  |
|                        |            | internal      | not included  |
|                        |            | antisense     | 40 reads      |
|                        |            | orphan        | 20 reads      |
|                        | 5'UTR      | all           | 80 percentile |
| dRNA-Seq (TEX-)        | intergenic | 3'UTR         | 60 percentile |
|                        |            | interCDS      | 70 percentile |
|                        |            | primary       | not included  |
|                        |            | secondary     | not included  |
| fragmenetation RNA-Seq | intergenic | internal      | not included  |
|                        |            | antisense     | 30 reads      |
|                        |            | orphan        | 10 reads      |
|                        |            | 5'UTR         | 70 percentile |
|                        |            | 3'UTR         | 50 percentile |
|                        | interCDS   | 60 percentile |               |
| fragmenetation RNA-Seq | intergenic | primary       | 400 reads     |
|                        |            | secondary     | 200 reads     |
|                        |            | internal      | not included  |
|                        |            | antisense     | 50 reads      |
|                        |            | orphan        | 20 reads      |
|                        |            | 5'UTR         | 70 percentile |
| fragmenetation RNA-Seq | intergenic | 3'UTR         | 50 percentile |
|                        |            | interCDS      | 60 percentile |
|                        |            | all           | 60 percentile |

The minimum coverage of UTR-derived sRNA must be higher than 50.
